# Supplementary material for: W-shaped 1,3-di(2,4-dicarboxyphenyl)benzene based lanthanide coordination polymers with tunable white light emission
Source: Royal Society of Chemistry journal article supplement (doi:10.1039/c6nj00294c), 2016-01-01
Supplement: c6nj00294c1.pdf [file c6nj00294c1.pdf]

*Electronic Supplementary Information (ESI) for*

## W-shaped 1,3-Di(2,4-dicarboxyphenyl)benzene Based Lanthanide Coordination Polymers with Tunable White Light Emission

Liming Fan,<sup>a,c</sup> Weiliu Fan,<sup>a</sup> Bin Li,<sup>b</sup> Xian Zhao<sup>\*a</sup> and Xiutang Zhang<sup>\*a,b</sup>

<sup>a</sup> State Key Laboratory of Crystal Materials, Shandong University, Jinan 250100, China. <sup>b</sup> Advanced Material Institute of Research, College of Chemistry and Chemical Engineering, Qilu Normal University, Jinan, 250013, China. <sup>c</sup> Department of Chemistry, College of Science, North University of China, Taiyuan 030051, China.

E-mail: zhaoxian@icm.sdu.edu.cn; xiutangzhang@163.com.

10

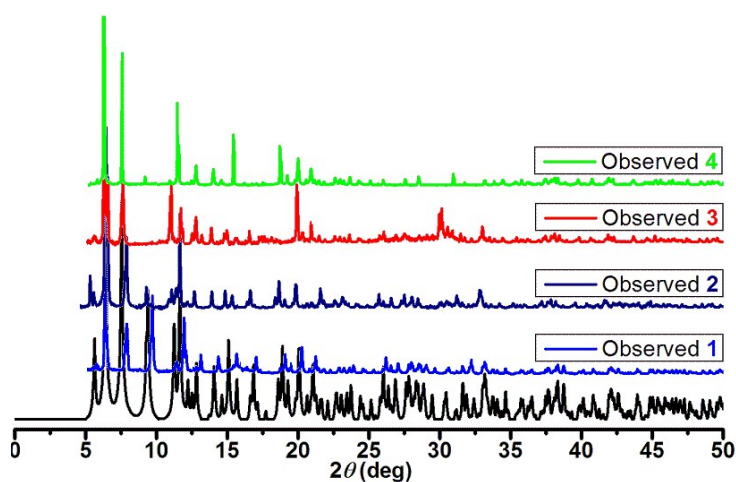

Fig. S1. PXRD patterns of 1-4.

15

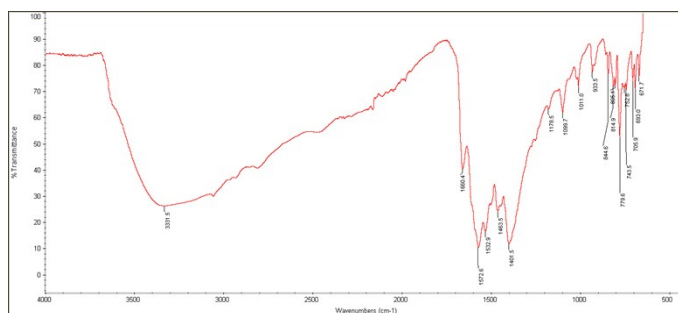

(1)

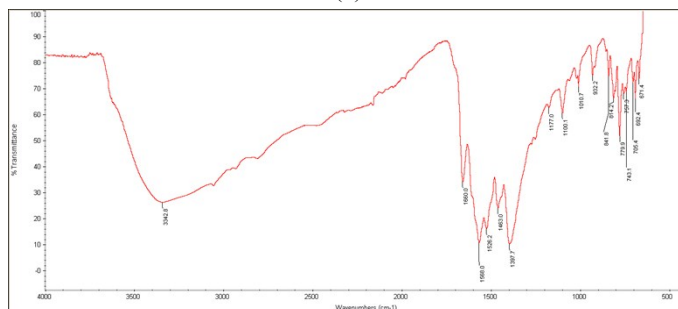

(2)

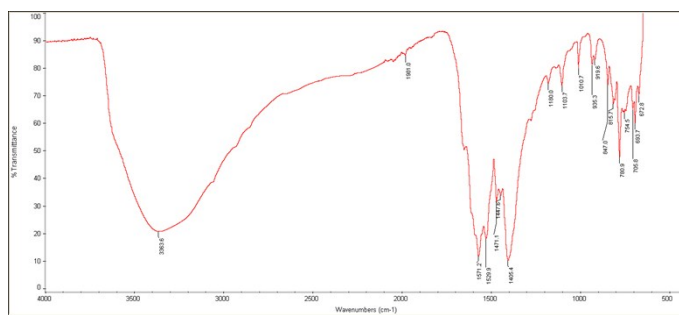

(3)

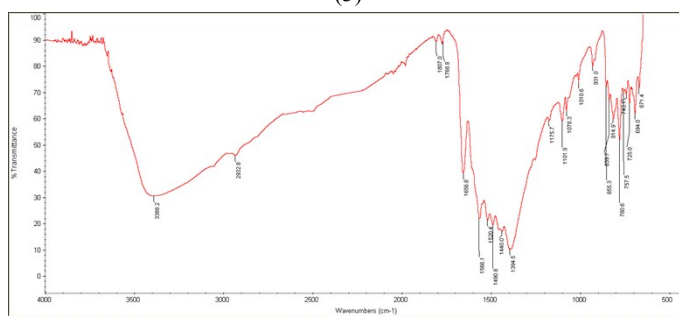

(4)

5

Fig. S2 The IR spectrum of complex 1-4.

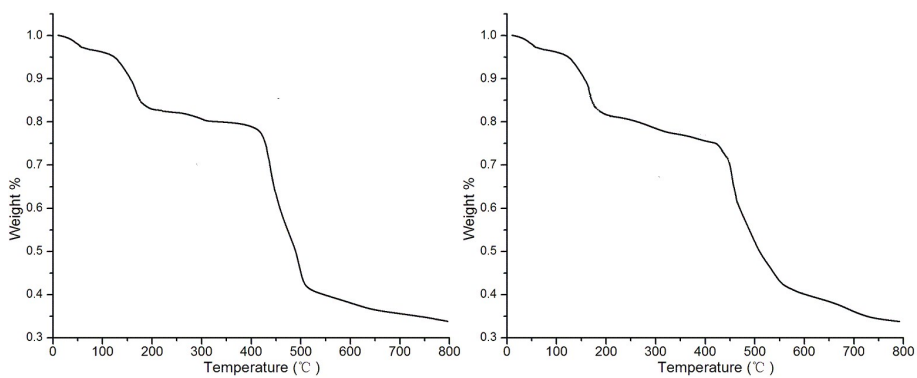

(1)

(2)

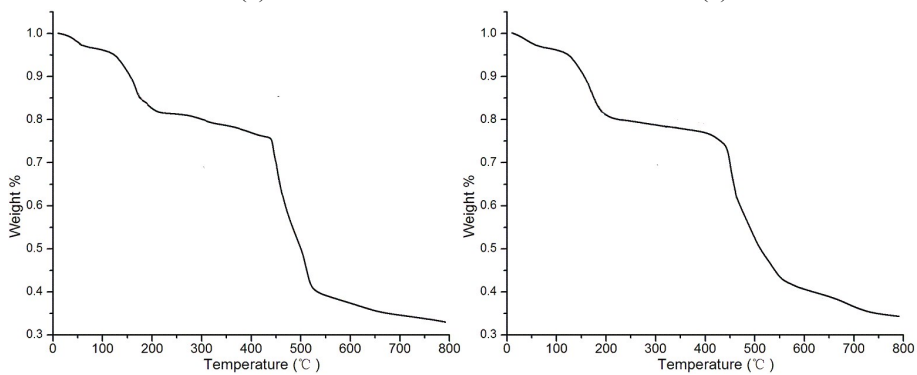

(3)

(4)

Fig. S3. TG curves of 1-4.

10

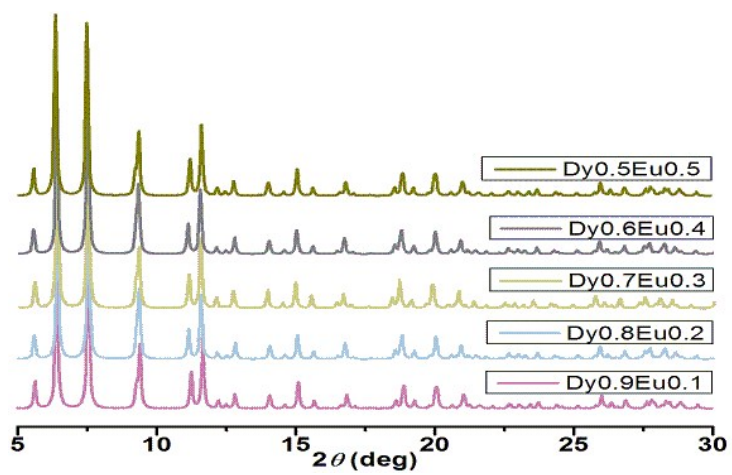

Fig. S4. XRD patterns of the Dy<sub>x</sub>Eu<sub>1-x</sub> doped complexes.



|                                              |            |                                              |            |                                              |          |                                              |          |
|----------------------------------------------|------------|----------------------------------------------|------------|----------------------------------------------|----------|----------------------------------------------|----------|
| O(2)-Dy(1)-O(2) <sup>#3</sup>                | 143.3(3)   | O(4) <sup>#2</sup> -Dy(1)-O(7) <sup>#3</sup> | 122.09(19) | O(7)-Dy(2)-O(3) <sup>#2</sup>                | 117.1(2) | O(9)-Dy(2)-O(10)                             | 70.8(6)  |
| O(4) <sup>#1</sup> -Dy(1)-O(12)              | 80.07(16)  | O(2)-Dy(1)-O(7) <sup>#3</sup>                | 140.19(19) | O(1)-Dy(2)-O(9)                              | 72.7(4)  | O(6) <sup>#4</sup> -Dy(2)-O(10)              | 71.8(3)  |
| O(4) <sup>#2</sup> -Dy(1)-O(12)              | 80.07(16)  | O(2) <sup>#3</sup> -Dy(1)-O(7) <sup>#3</sup> | 70.84(18)  | O(7)-Dy(2)-O(9)                              | 144.1(4) | O(11)-Dy(2)-O(10)                            | 73.0(4)  |
| O(2)-Dy(1)-O(12)                             | 71.65(14)  | O(12)-Dy(1)-O(7) <sup>#3</sup>               | 134.32(11) | O(3) <sup>#2</sup> -Dy(2)-O(9)               | 77.2(4)  | O(1)-Dy(2)-O(5) <sup>#4</sup>                | 78.2(2)  |
| O(2) <sup>#3</sup> -Dy(1)-O(12)              | 71.65(14)  | O(8) <sup>#3</sup> -Dy(1)-O(7) <sup>#3</sup> | 49.29(18)  | O(1)-Dy(2)-O(6) <sup>#4</sup>                | 131.3(3) | O(7)-Dy(2)-O(5) <sup>#4</sup>                | 80.1(2)  |
| O(4) <sup>#1</sup> -Dy(1)-O(8) <sup>#3</sup> | 122.4(2)   | O(8)-Dy(1)-O(7) <sup>#3</sup>                | 65.70(18)  | O(7)-Dy(2)-O(6) <sup>#4</sup>                | 85.8(2)  | O(3) <sup>#2</sup> -Dy(2)-O(5) <sup>#4</sup> | 150.2(3) |
| O(4) <sup>#2</sup> -Dy(1)-O(8) <sup>#3</sup> | 74.1(2)    | O(4) <sup>#1</sup> -Dy(1)-O(7)               | 122.09(19) | O(3) <sup>#2</sup> -Dy(2)-O(6) <sup>#4</sup> | 144.6(3) | O(9)-Dy(2)-O(5) <sup>#4</sup>                | 75.5(4)  |
| O(2)-Dy(1)-O(8) <sup>#3</sup>                | 136.0(2)   | O(4) <sup>#2</sup> -Dy(1)-O(7)               | 73.1(2)    | O(9)-Dy(2)-O(6) <sup>#4</sup>                | 100.3(3) | O(6) <sup>#4</sup> -Dy(2)-O(5) <sup>#4</sup> | 53.9(2)  |
| O(2) <sup>#3</sup> -Dy(1)-O(8) <sup>#3</sup> | 76.1(2)    | O(2)-Dy(1)-O(7)                              | 70.84(18)  | O(1)-Dy(2)-O(11)                             | 136.3(2) | O(11)-Dy(2)-O(5) <sup>#4</sup>               | 126.1(2) |
| O(12)-Dy(1)-O(8) <sup>#3</sup>               | 139.58(11) | O(2) <sup>#3</sup> -Dy(1)-O(7)               | 140.19(19) | O(7)-Dy(2)-O(11)                             | 73.5(2)  | O(10)-Dy(2)-O(5) <sup>#4</sup>               | 107.5(4) |
| O(4) <sup>#1</sup> -Dy(1)-O(8)               | 74.1(2)    |                                              |            |                                              |          |                                              |          |

Symmetry codes: #1 -x, -y, z; #2 -y+1/2, x-1/2, -z+1/2; #3 y-1/2, -x+1/2, -z+1/2; #4 x, -y+1/2, -z+1/4; #5 y+1/2, x, z-1/4.

---
